# Supplementary material for: Metal ion size profoundly affects H3glyox chelate chemistry
Source: Royal Society of Chemistry journal article supplement (doi:10.1039/d1ra01793d), 2021-01-01
Supplement: d1ra01793d1.pdf [file d1ra01793d1.pdf]

Electronic Supplementary Information (ESI) for:

## **Metal ion size profoundly affects**

## **H<sub>3</sub>glyox chelate chemistry**

*Neha Choudhary,<sup>a,b</sup> Kendall E. Barrett,<sup>c</sup> Manja Kubeil,<sup>d</sup> Valery Radchenko,<sup>b,e</sup> Jonathan Engle,<sup>c</sup> Holger  
Stephan,<sup>d</sup> María de Guadalupe Jaraquemada-Peláez<sup>\*a</sup> and Chris Orvig<sup>\*a</sup>*

<sup>a</sup> Medicinal Inorganic Chemistry Group, Department of Chemistry, University of British Columbia, 2036  
Main Mall, Vancouver, British Columbia V6T 1Z1, Canada

<sup>b</sup> Life Sciences Division, TRIUMF, 4004 Wesbrook Mall, Vancouver, British Columbia V6T  
2A3, Canada

<sup>c</sup> University of Wisconsin Department of Medical Physics, 1111 Highland Avenue, Madison, WI, 53711,  
USA

<sup>d</sup> Institute of Radiopharmaceutical Cancer Research, Helmholtz-Zentrum Dresden-Rossendorf, Bautzner  
Landstraße 400, D-01328 Dresden, Germany

<sup>e</sup> Department of Chemistry, University of British Columbia, 2036 Main Mall, Vancouver, British  
Columbia V6T 1Z1, Canada

\*Corresponding Authors: Chris Orvig ([orvig@chem.ubc.ca](mailto:orvig@chem.ubc.ca)) and María de Guadalupe Jaraquemada-Peláez  
([mdgjara@chem.ubc.ca](mailto:mdgjara@chem.ubc.ca))

## Table of Contents

|                                                           |            |
|-----------------------------------------------------------|------------|
| <b>NMR spectra of compounds 1 – 4 .....</b>               | <b>S3</b>  |
| <b>High resolution mass spectra.....</b>                  | <b>S6</b>  |
| <b>Solution thermodynamics .....</b>                      | <b>S9</b>  |
| <b>Radiolabeling .....</b>                                | <b>S11</b> |
| <b>Density functional theory (DFT) calculations .....</b> | <b>S15</b> |
| <b>References .....</b>                                   | <b>S16</b> |

## NMR spectra of compounds 1-4

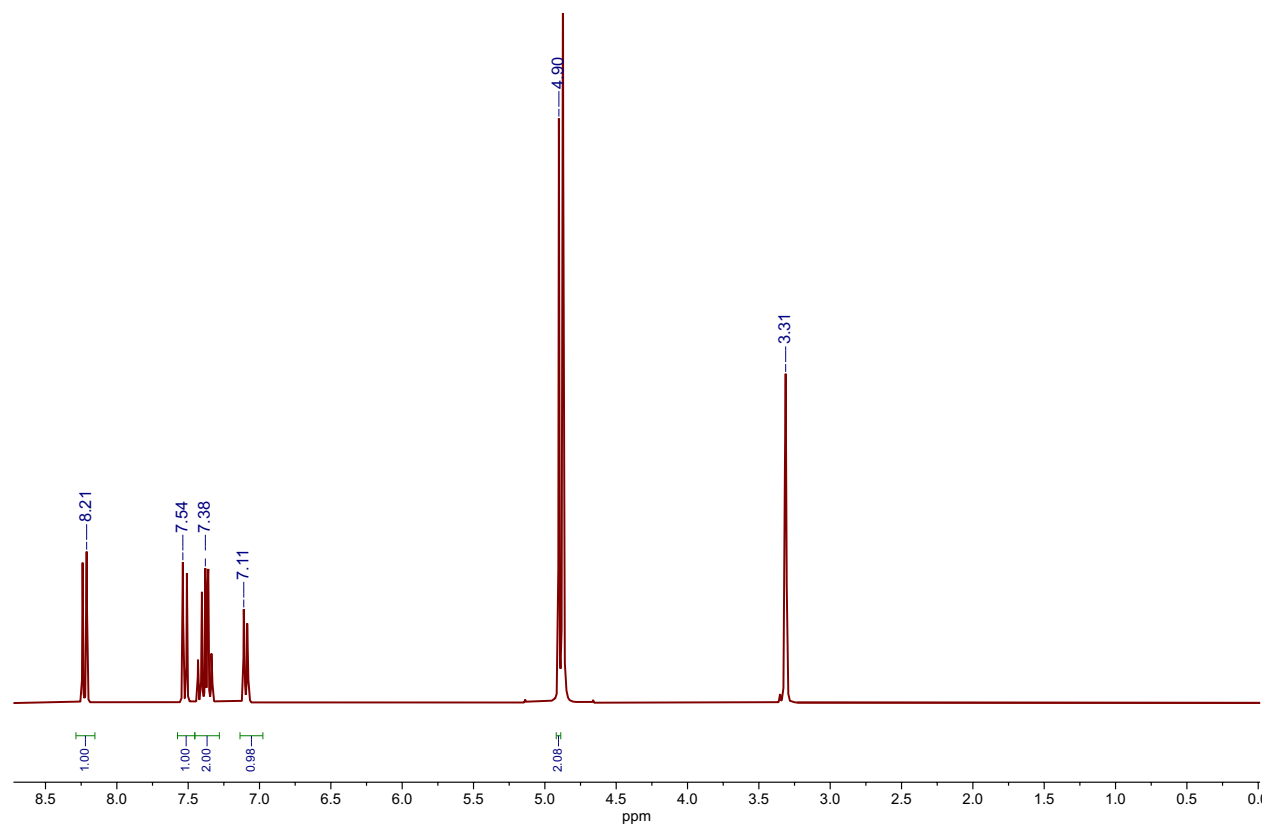

**Figure S1.** Compound 1 <sup>1</sup>H NMR spectrum (400 MHz, 298 K, MeOD-d<sup>4</sup>).

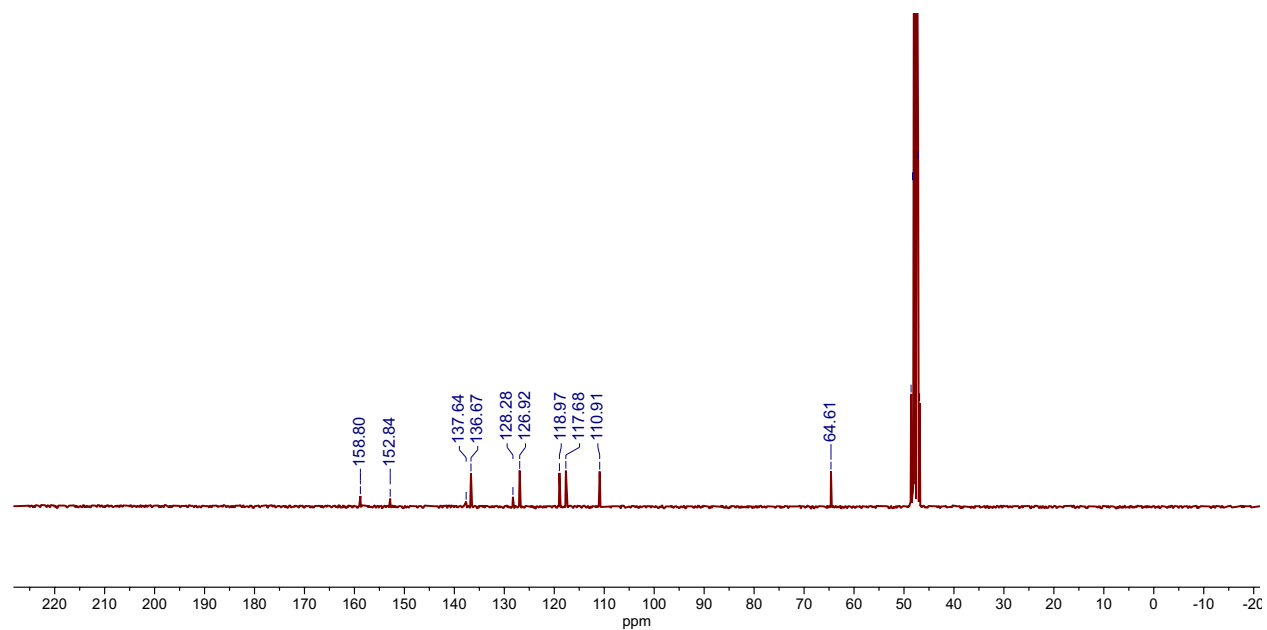

**Figure S2.** Compound 1 <sup>13</sup>C NMR spectrum (75 MHz, 298 K, MeOD-d<sup>4</sup>).

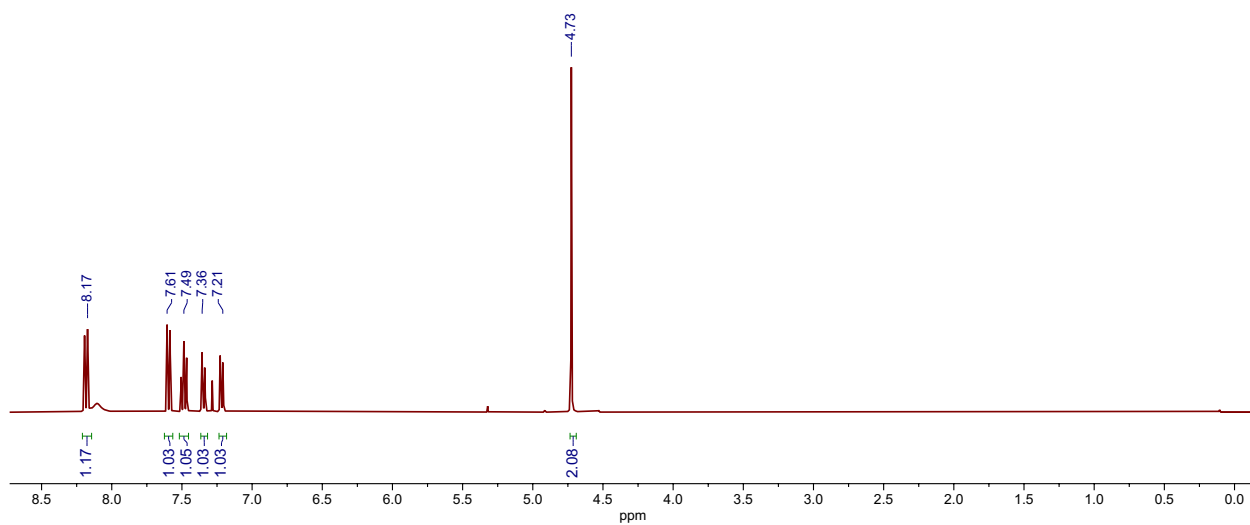

**Figure S3.** Compound **2**  $^1\text{H}$  NMR spectrum (400 MHz, 298 K,  $\text{CDCl}_3$ ).

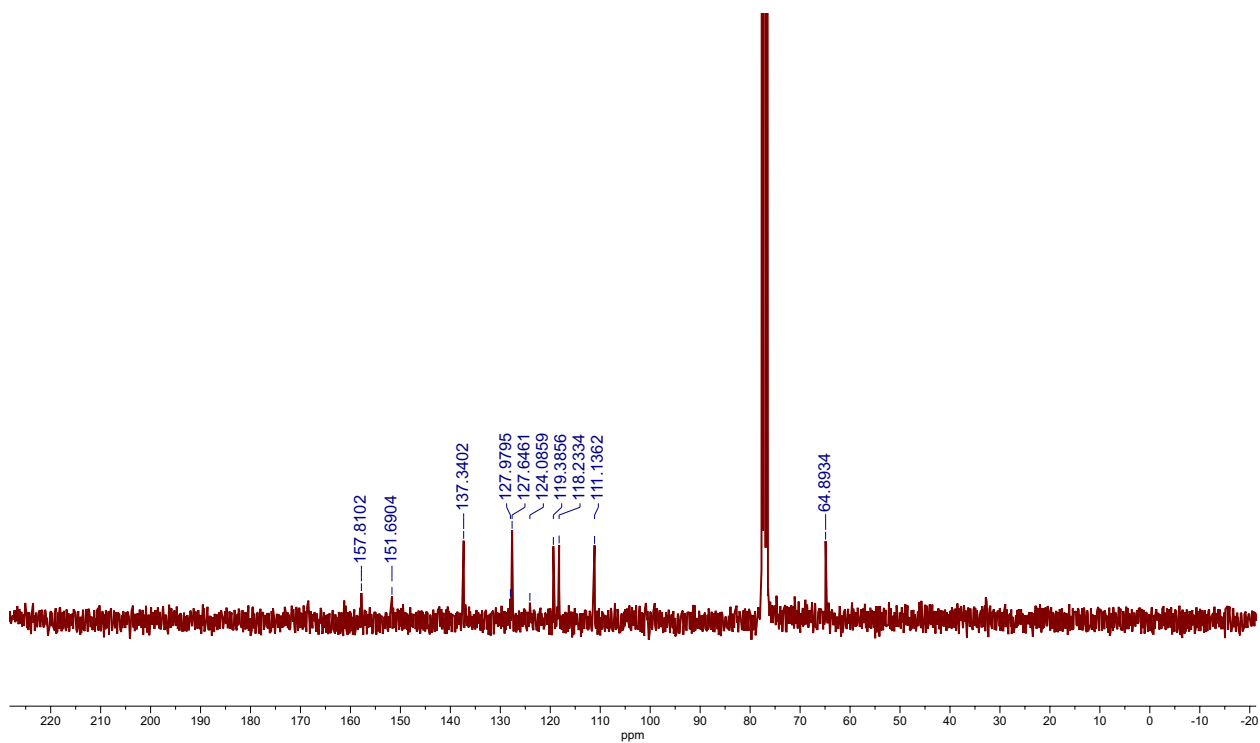

**Figure S4.** Compound **2**  $^{13}\text{C}$  NMR spectrum (75 MHz, 298 K,  $\text{CDCl}_3$ ).

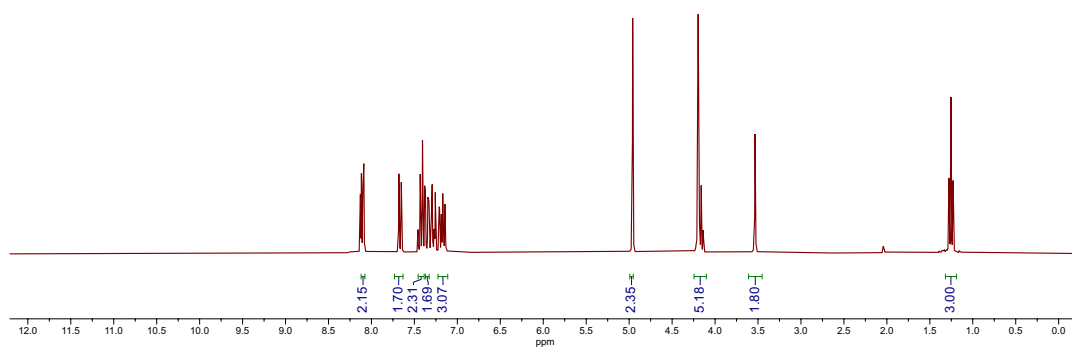

**Figure S5.** Compound **3**  $^1\text{H}$  NMR spectrum (400 MHz, 298 K,  $\text{CDCl}_3$ ).

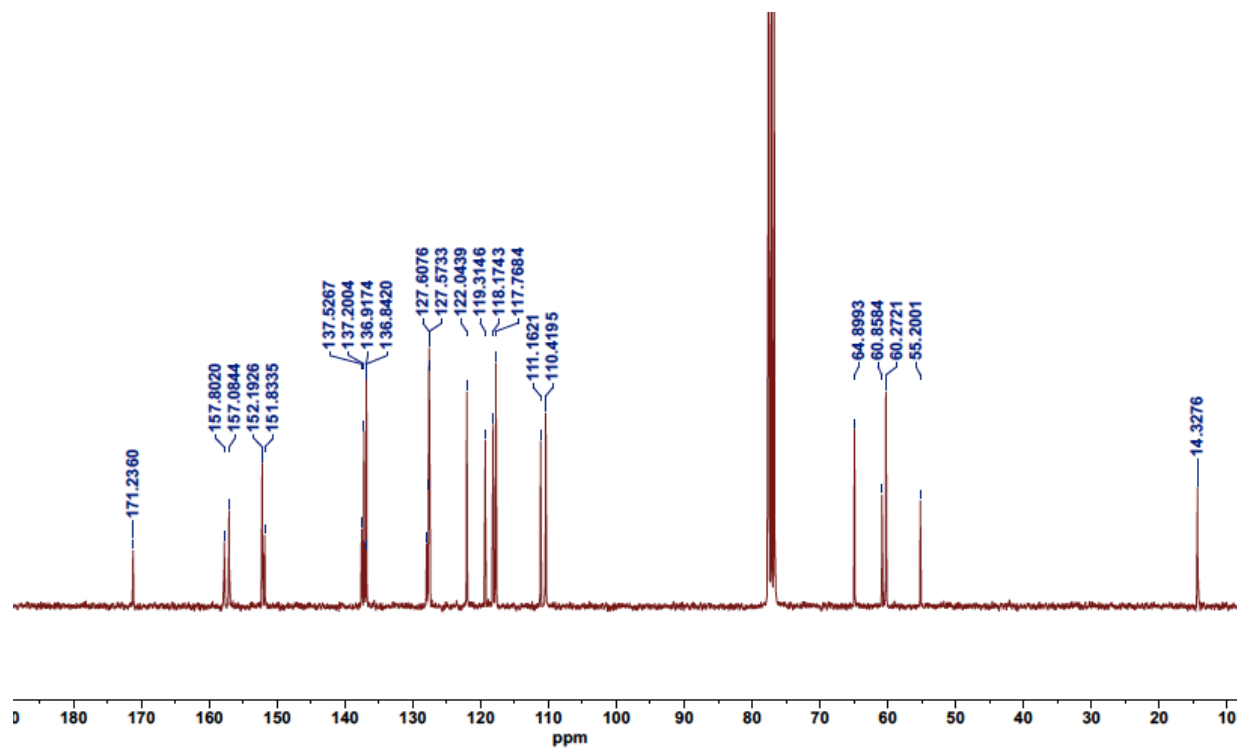

**Figure S6.** Compound **3**  $^{13}\text{C}$  NMR spectrum (75 MHz, 298 K,  $\text{CDCl}_3$ ).

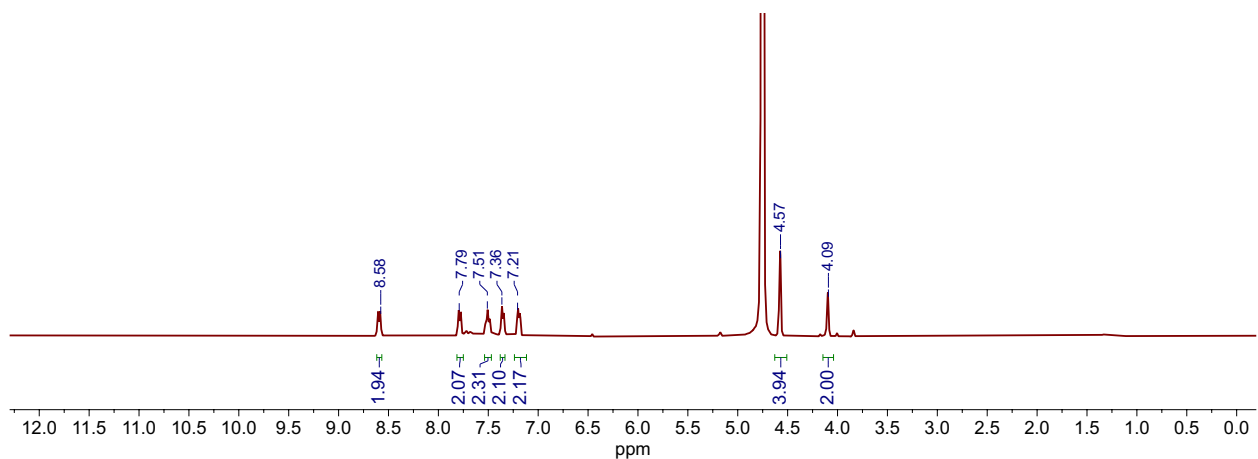

**Figure S7.** Compound **4**, H<sub>3</sub>glyox <sup>1</sup>H NMR spectrum (400 MHz, 298 K, D<sub>2</sub>O).

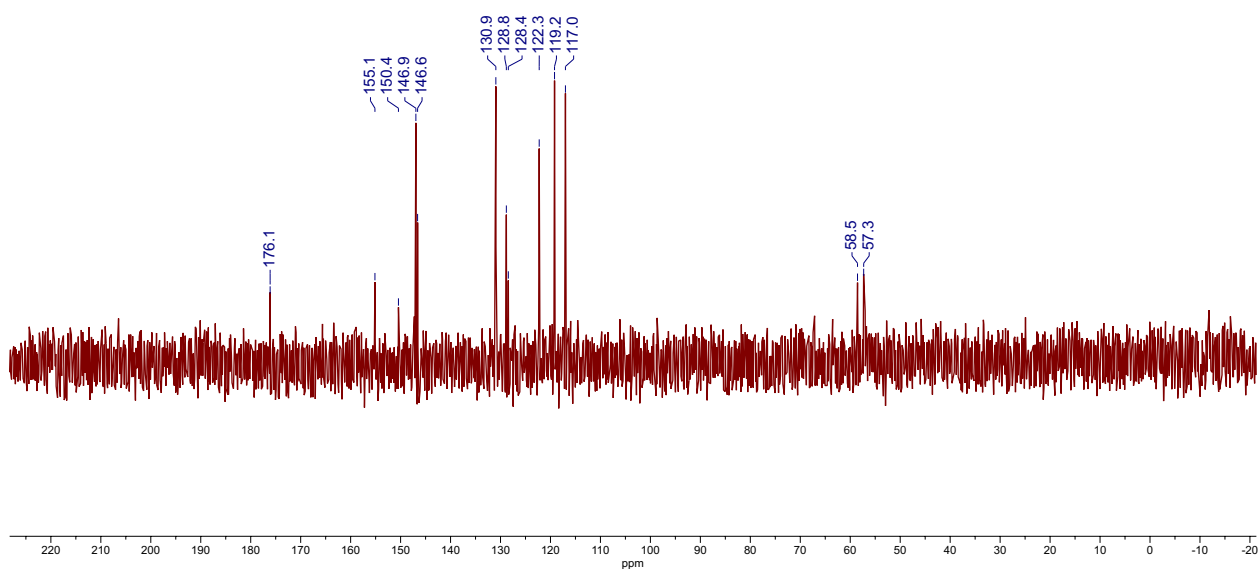

**Figure S8.** Compound **4** <sup>13</sup>C NMR spectrum (75 MHz, 298 K, D<sub>2</sub>O).

**Table S1.** High resolution mass spectra<sup>a</sup>

| Species                                                                        | Calculated Mass | Measured Mass                  |
|--------------------------------------------------------------------------------|-----------------|--------------------------------|
| C <sub>22</sub> H <sub>19</sub> N <sub>3</sub> O <sub>4</sub>                  | 389.1400        | 390.1451 [M + H] <sup>+</sup>  |
| C <sub>22</sub> H <sub>16</sub> <sup>175</sup> LuN <sub>3</sub> O <sub>4</sub> | 561.0548        | 562.0546 [M + H] <sup>+</sup>  |
| C <sub>22</sub> H <sub>17</sub> <sup>55</sup> MnN <sub>3</sub> O <sub>4</sub>  | 442.0599        | 443.0601 [M + H] <sup>+</sup>  |
| C <sub>22</sub> H <sub>17</sub> <sup>63</sup> CuN <sub>3</sub> O <sub>4</sub>  | 450.0515        | 473.0412 [M + Na] <sup>+</sup> |

<sup>a</sup> All masses obtained *via* high resolution electrospray ionization, positive mode.

## Solution thermodynamics

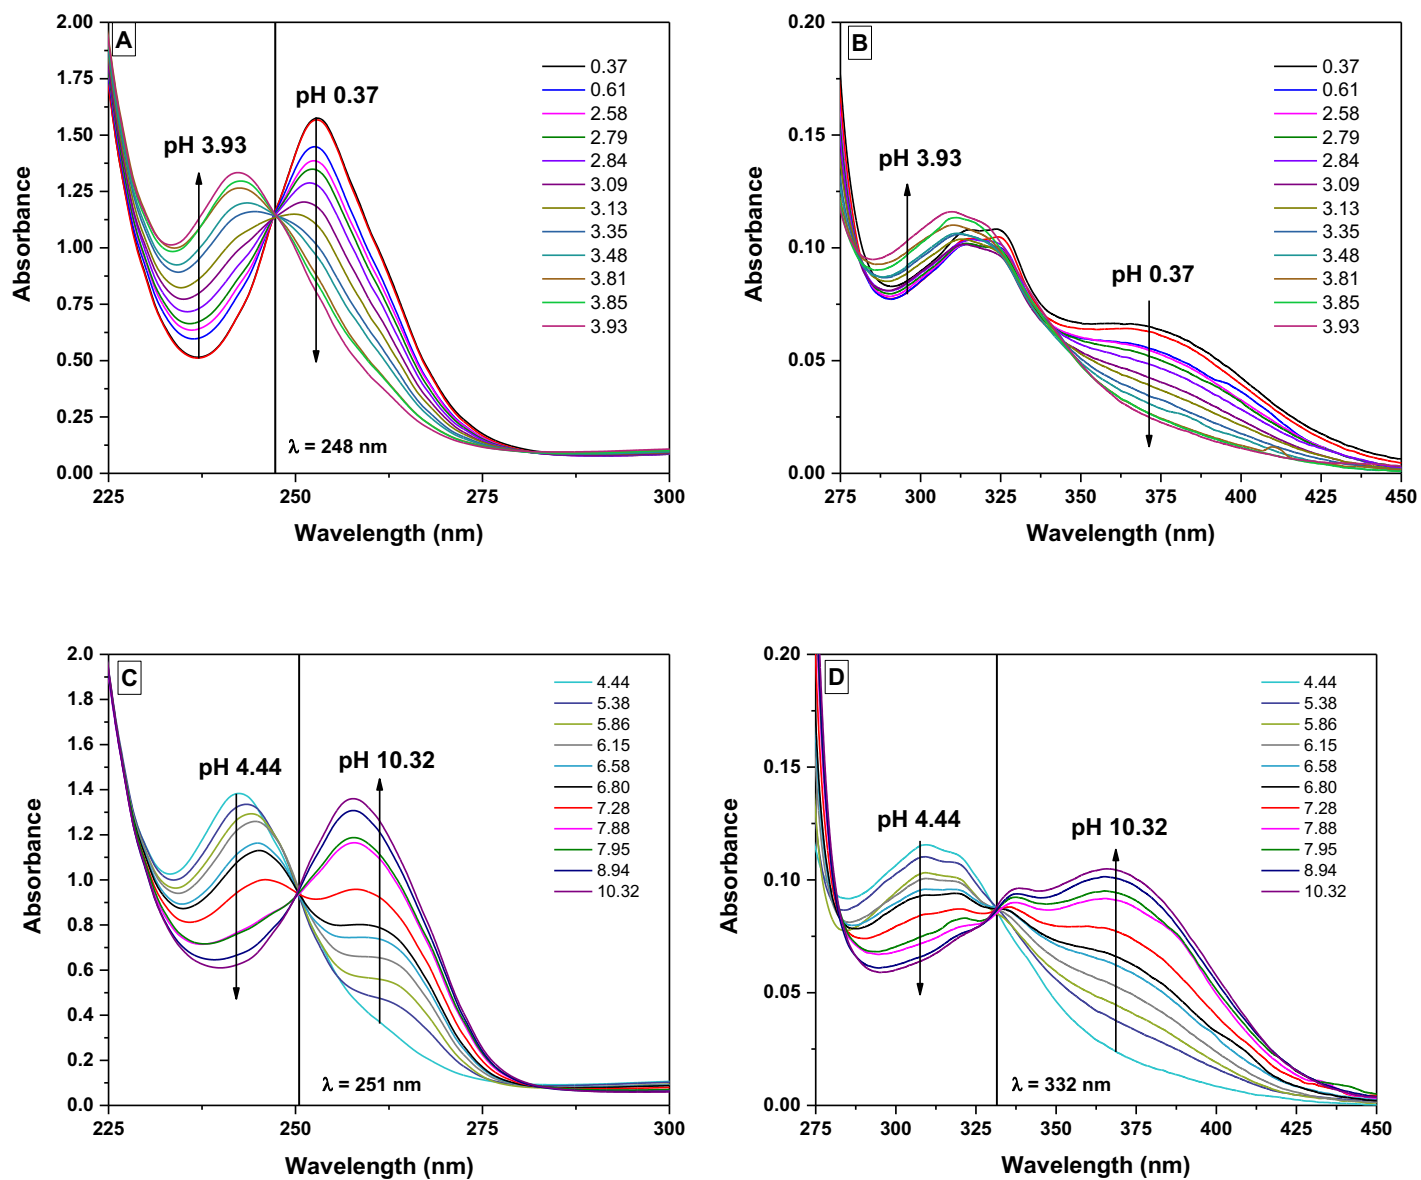

**Figure S9.** (A-D) Representative spectra of the in-batch UV spectrophotometric titration of  $\text{Mn}^{2+}$ - $\text{H}_3\text{glyox}$  system  $[\text{H}_3\text{glyox}] = [\text{Mn}^{2+}] = 2.5 \times 10^{-5}$  M at 25 °C,  $I = 0.16$  M (NaCl),  $l = 1$  cm.

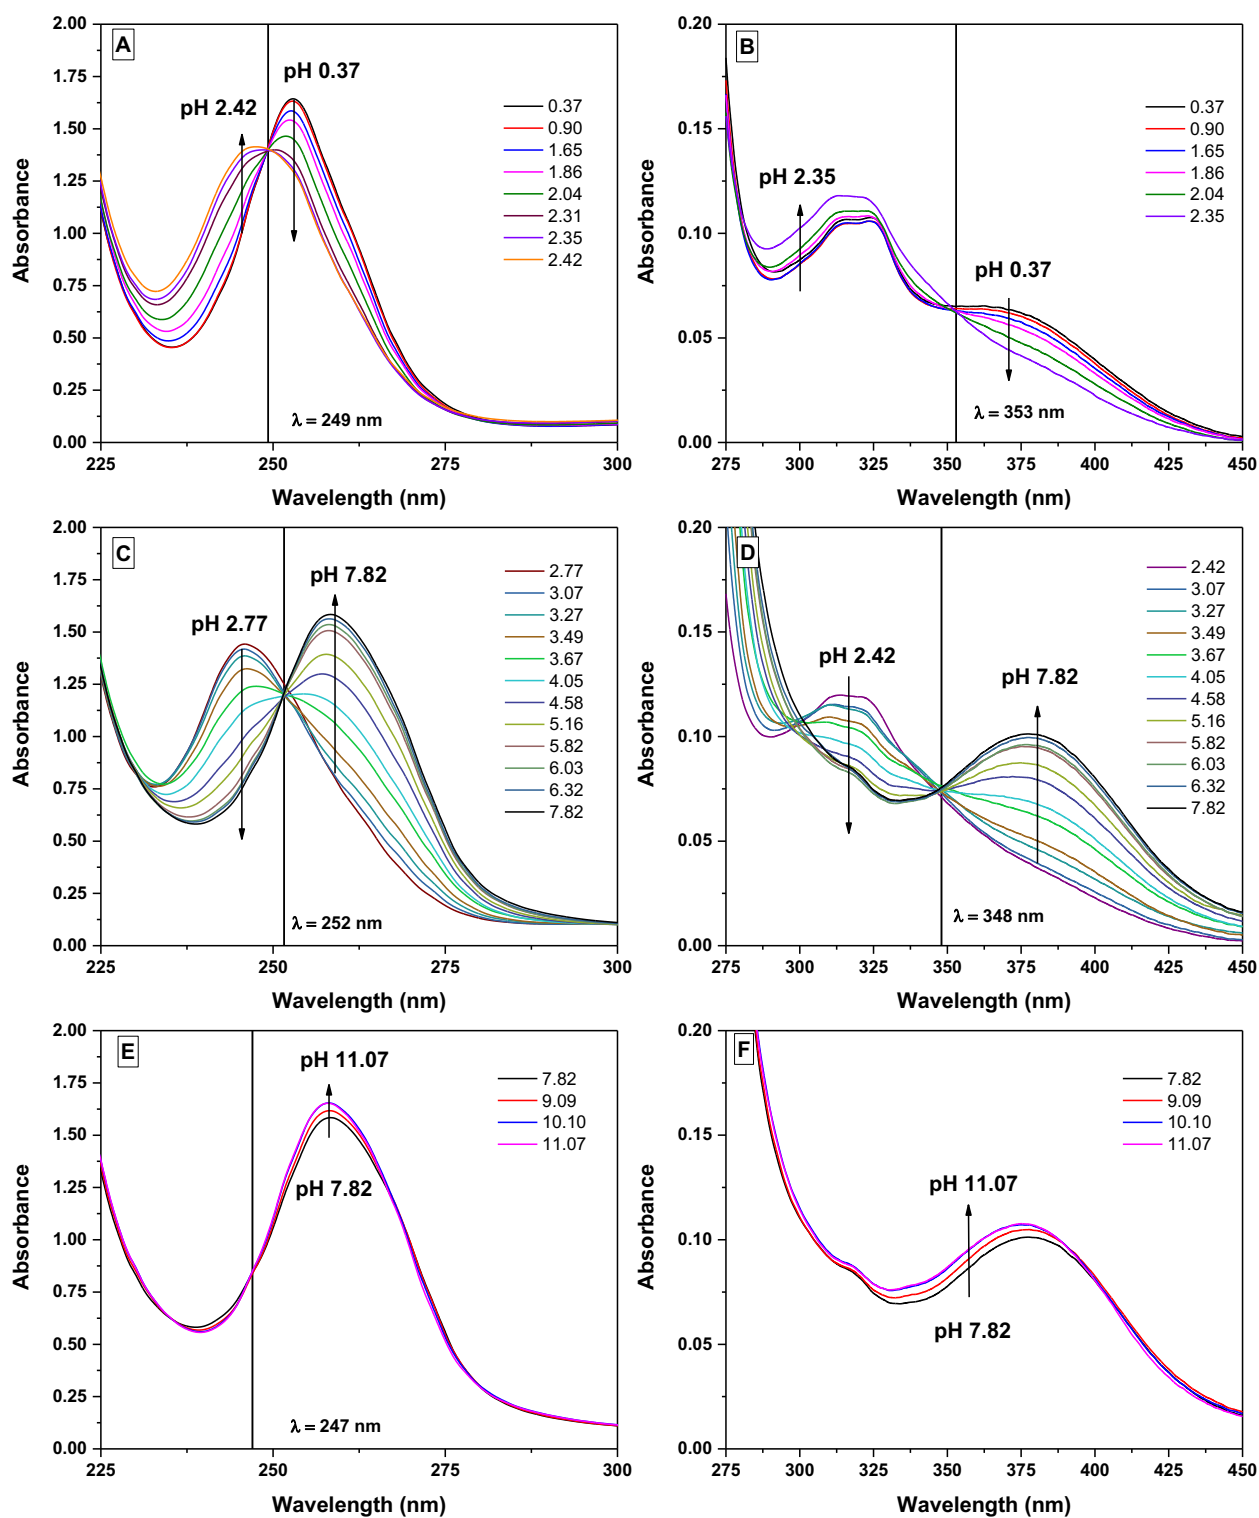

**Figure S10.** Representative spectra of the in-batch UV spectrophotometric titration of  $\text{Cu}^{2+}$ - $\text{H}_3\text{glyox}$  system  $[\text{H}_3\text{glyox}] = [\text{Cu}^{2+}] = 2.5 \times 10^{-5}$  M at  $25^\circ\text{C}$ ,  $I = 0.16$  M (NaCl),  $l = 1$  cm.



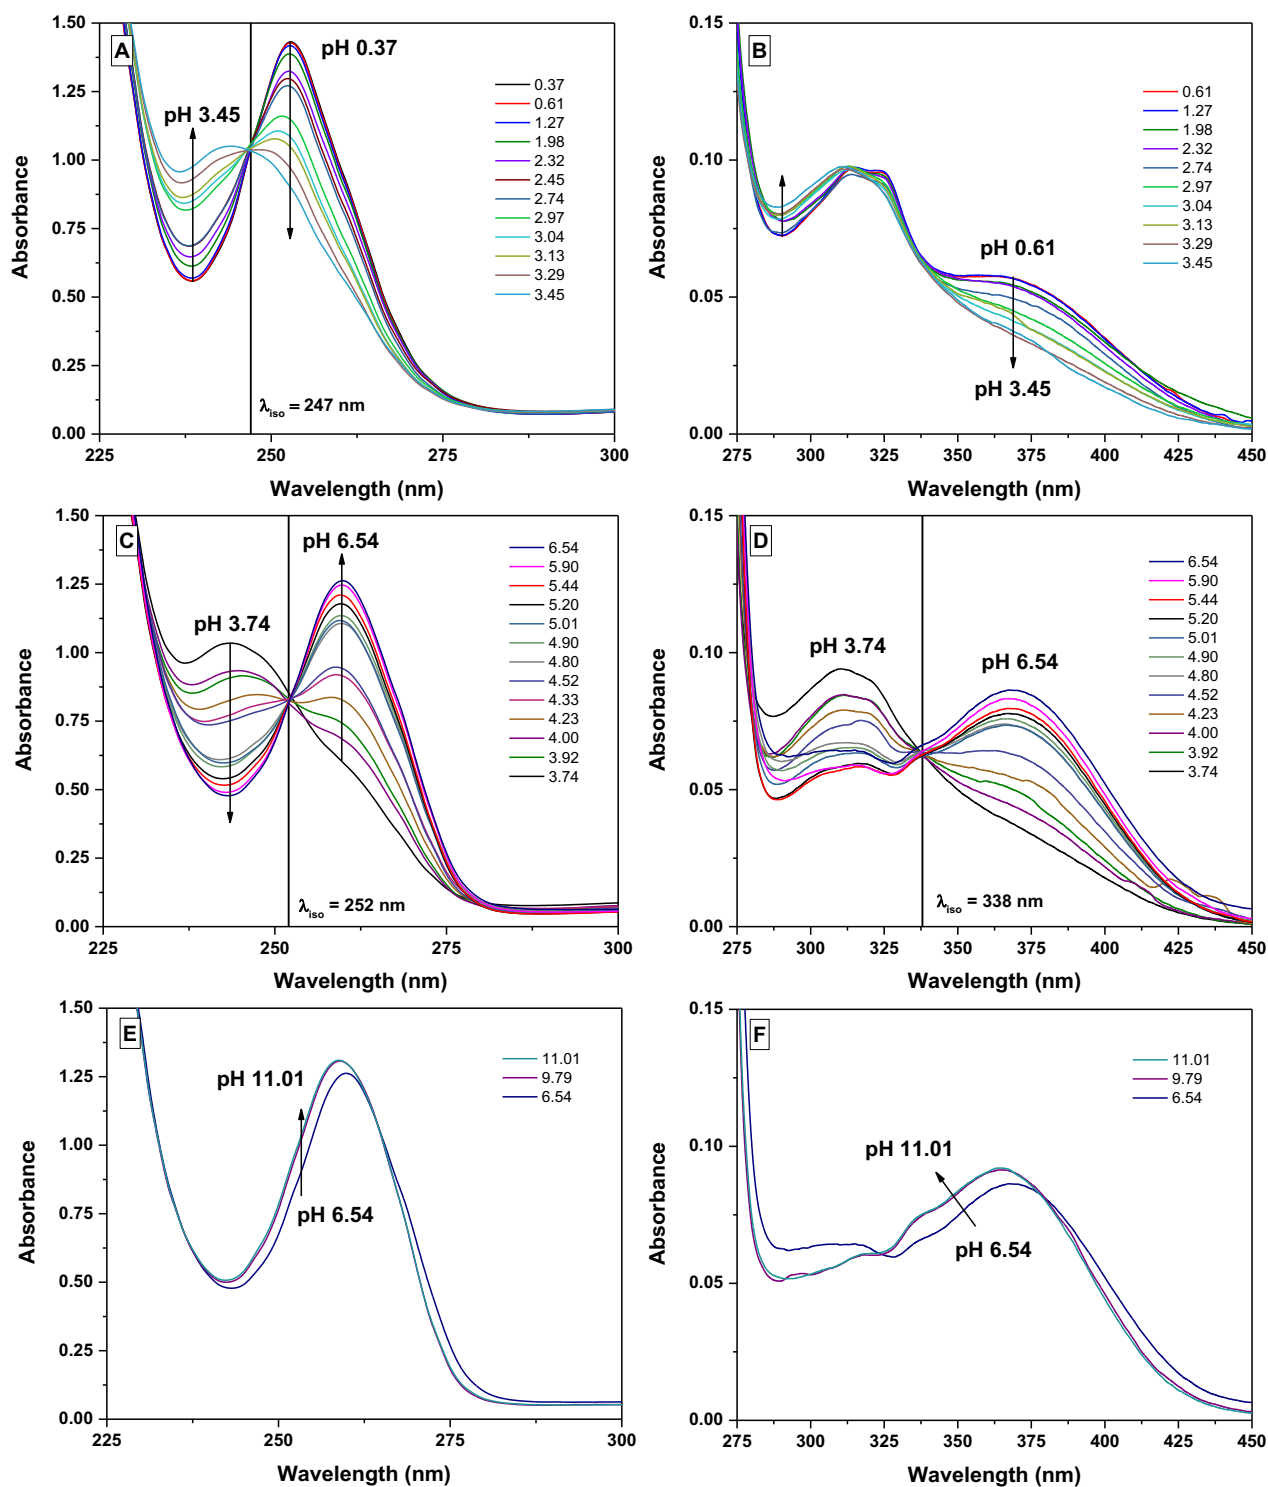

**Figure S11.** Representative spectra of the in-batch UV spectrophotometric titration of  $\text{Lu}^{3+}$ - $\text{H}_3\text{glyox}$  system  $[\text{H}_3\text{glyox}] = [\text{Lu}^{3+}] = 2.17 \times 10^{-5} \text{ M}$  at  $25 \text{ }^\circ\text{C}$ ,  $I = 0.16 \text{ M}$  (NaCl),  $l = 1 \text{ cm}$ .

## Radiolabeling

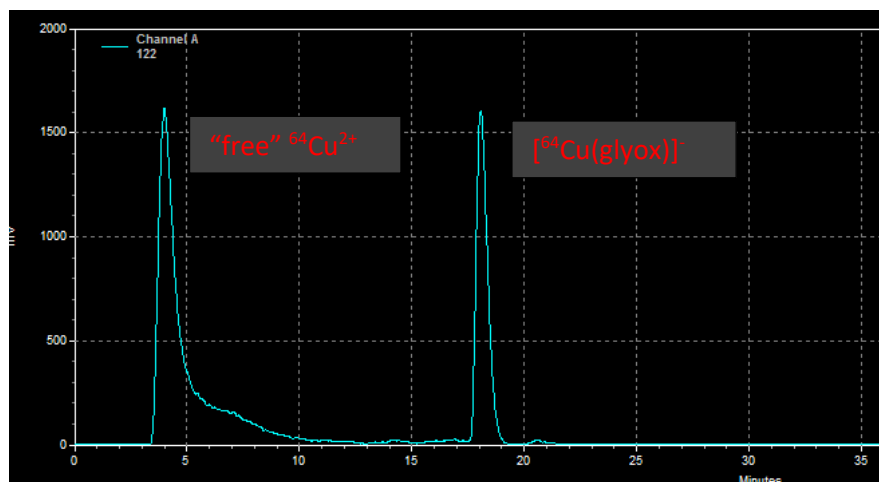

**Figure S12.** Radio-HPLC trace of free  $^{64}\text{Cu}[\text{CuCl}_2]$  ( $t_R = 4.0$  min) and  $^{64}\text{Cu}[\text{Cu}(\text{glyox})]^-$  ( $t_R = 17.5$  min) radiolabeled in 0.1 M NaOAc buffer pH 6, 15 min, RT,  $[\text{H}_3\text{glyox}] = 10^{-4}$  M.

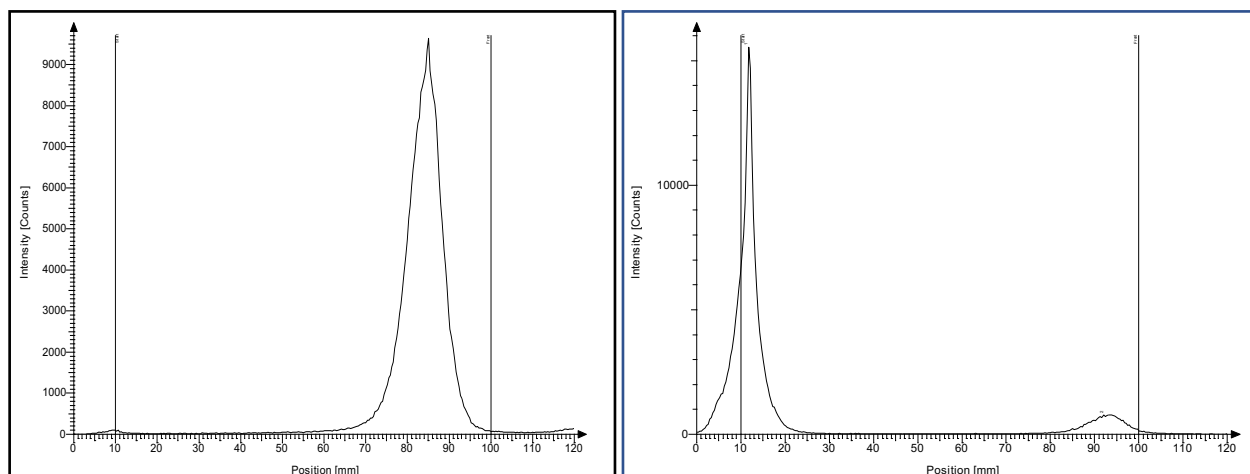

**Figure S13.** Crude i-TLC radiochromatographs of "free"  $^{64}\text{Cu}[\text{Cu}^{2+}]$  (left) and  $^{64}\text{Cu}[\text{Cu}(\text{glyox})]^-$  (right); stationary phase: gel silica plates, mobile phase: 0.1 M aq. EDTA solution pH 5.

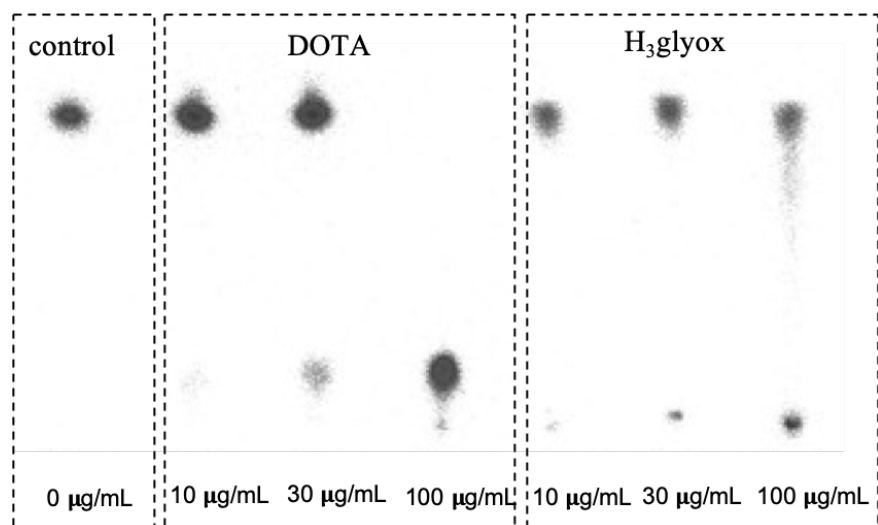

**Figure S14.** Crude i-TLC radiochromatographs of “free”  $[^{52g}\text{Mn}]\text{Mn}^{2+}$ ,  $[^{52g}\text{Mn}]\text{Mn}^{2+}$ -DOTA complex and  $[^{52g}\text{Mn}]\text{Mn}^{2+}$ -H<sub>3</sub>glyox with varying concentrations of DOTA and H<sub>3</sub>glyox (Stationary phase: gel silica plates, mobile phase: 0.1 M aq. sodium citrate pH 5.5).

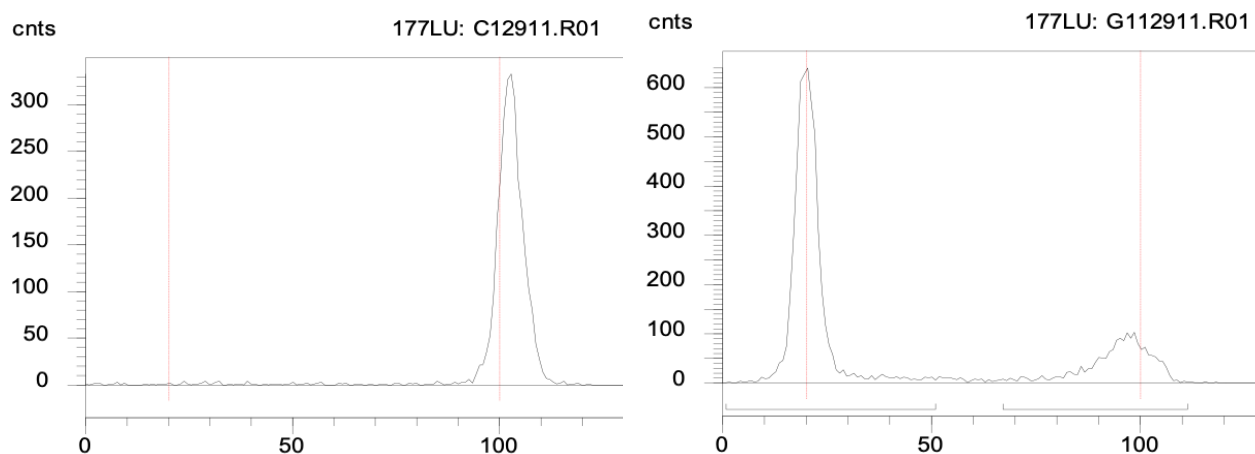

**Figure S15.** Crude i-TLC radiochromatographs of “free”  $[^{177}\text{Lu}]\text{Lu}^{3+}$  (left) and  $[^{177}\text{Lu}]\text{Lu}(\text{glyox})$  (right); stationary phase: gel silica plates, mobile phase: 0.1 M aq. EDTA solution pH 7.

## Density functional theory calculations

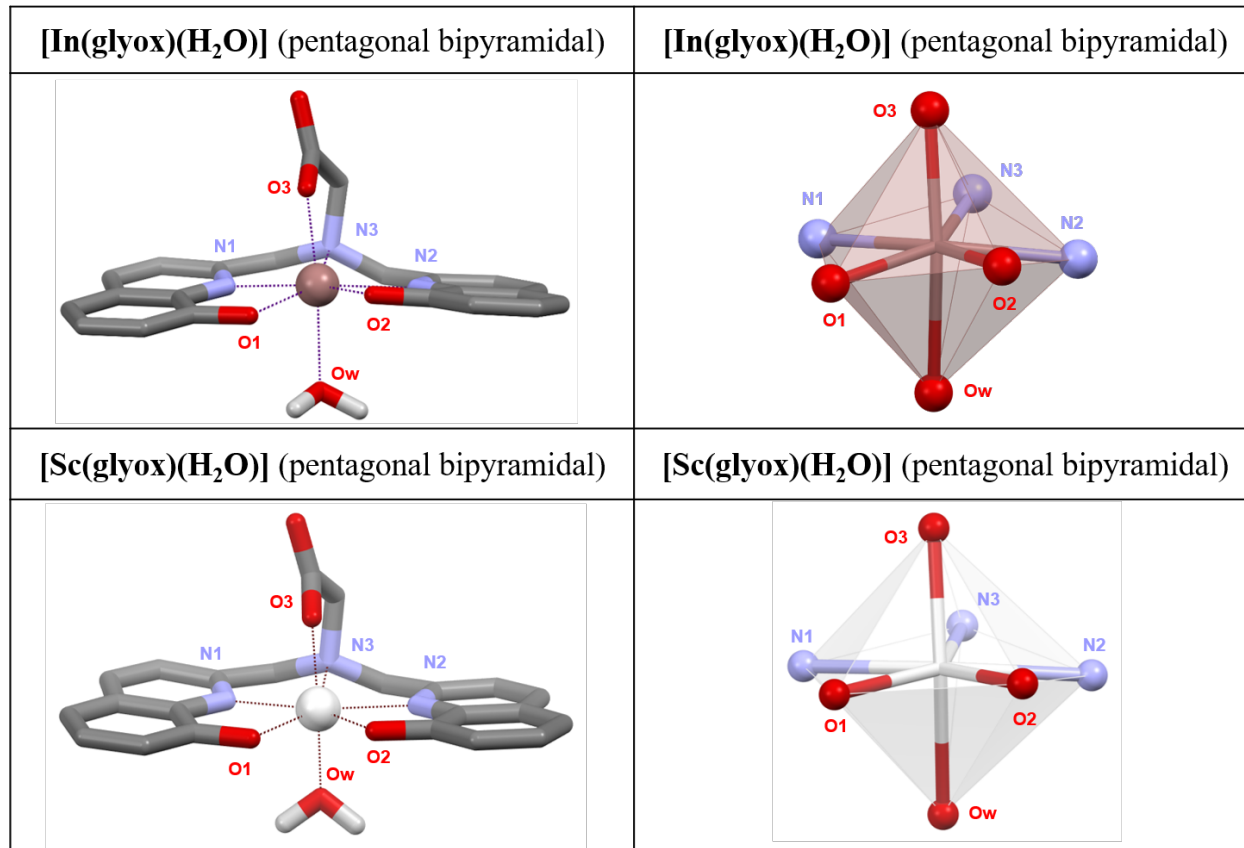

**Figure S16.** DFT calculated [In(glyox)(H<sub>2</sub>O)] and [Sc(glyox)(H<sub>2</sub>O)] structures.

**Table S2.** Bond lengths from calculated [In(glyox)(H<sub>2</sub>O)] and [Sc(glyox)(H<sub>2</sub>O)] DFT structures compared to the crystal structures.

|                                                 | M-O (ligand) distances (Å) |            |            |                        | M-N (Ligand) Distances (Å) |            |            |
|-------------------------------------------------|----------------------------|------------|------------|------------------------|----------------------------|------------|------------|
|                                                 | COOH<br>O3                 | Ox 1<br>O1 | Ox 2<br>O2 | H <sub>2</sub> O<br>Ow | Ox 1<br>N1                 | Ox 2<br>N2 | 3° N<br>N3 |
| [In(glyox)(H <sub>2</sub> O)]                   | 2.144                      | 2.173      | 2.171      | 2.372                  | 2.295                      | 2.291      | 2.575      |
| [In(glyox)(H <sub>2</sub> O)] crystal structure | 2.179(3)                   | 2.175(5)   | 2.163(6)   | 2.186(8)               | 2.269(6)                   | 2.265(6)   | 2.546(4)   |
| [Sc(glyox)(H <sub>2</sub> O)]                   | 2.040                      | 2.085      | 2.085      | 2.259                  | 2.314                      | 2.314      | 2.555      |
| [Sc(glyox)(H <sub>2</sub> O)] crystal structure | 2.090(3)                   | 2.123(18)  | 2.123(18)  | 2.124(3)               | 2.285(2)                   | 2.285(2)   | 2.515(3)   |

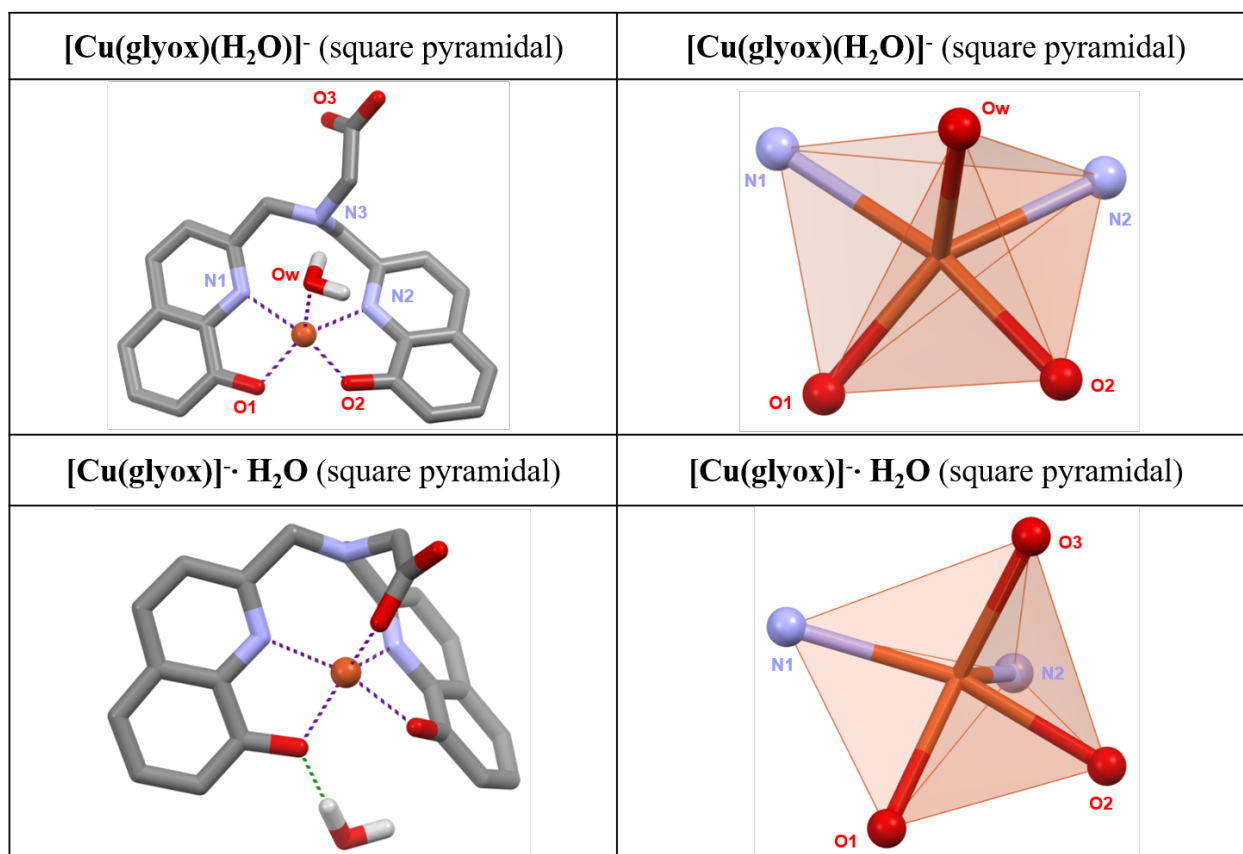

**Figure S17.** DFT calculated [Cu(glyox)(H<sub>2</sub>O)]<sup>-</sup> and [Cu(glyox)]<sup>-</sup> · H<sub>2</sub>O structures.

**Table S3.** Bond lengths from calculated [Cu(glyox)(H<sub>2</sub>O)]<sup>-</sup> and [Cu(glyox)]<sup>-</sup> · H<sub>2</sub>O structures.

|                                                 | M-O (ligand) distances (Å) |            |            |                        | M-N (Ligand) Distances (Å) |            |            | Free E (Ha) |
|-------------------------------------------------|----------------------------|------------|------------|------------------------|----------------------------|------------|------------|-------------|
|                                                 | COOH<br>O3                 | Ox 1<br>O1 | Ox 2<br>O2 | H <sub>2</sub> O<br>Ow | Ox 1<br>N1                 | Ox 2<br>N2 | 3° N<br>N3 |             |
| <b>[Cu(glyox)]<sup>-</sup> · H<sub>2</sub>O</b> | 2.048                      | 2.015      | 2.011      | -                      | 2.072                      | 2.205      | 2.765      | -1587.360   |
| <b>[Cu(glyox)(H<sub>2</sub>O)]<sup>-</sup></b>  | -                          | 1.930      | 1.962      | 2.357                  | 2.136                      | 2.086      | 3.234      | -1587.347   |

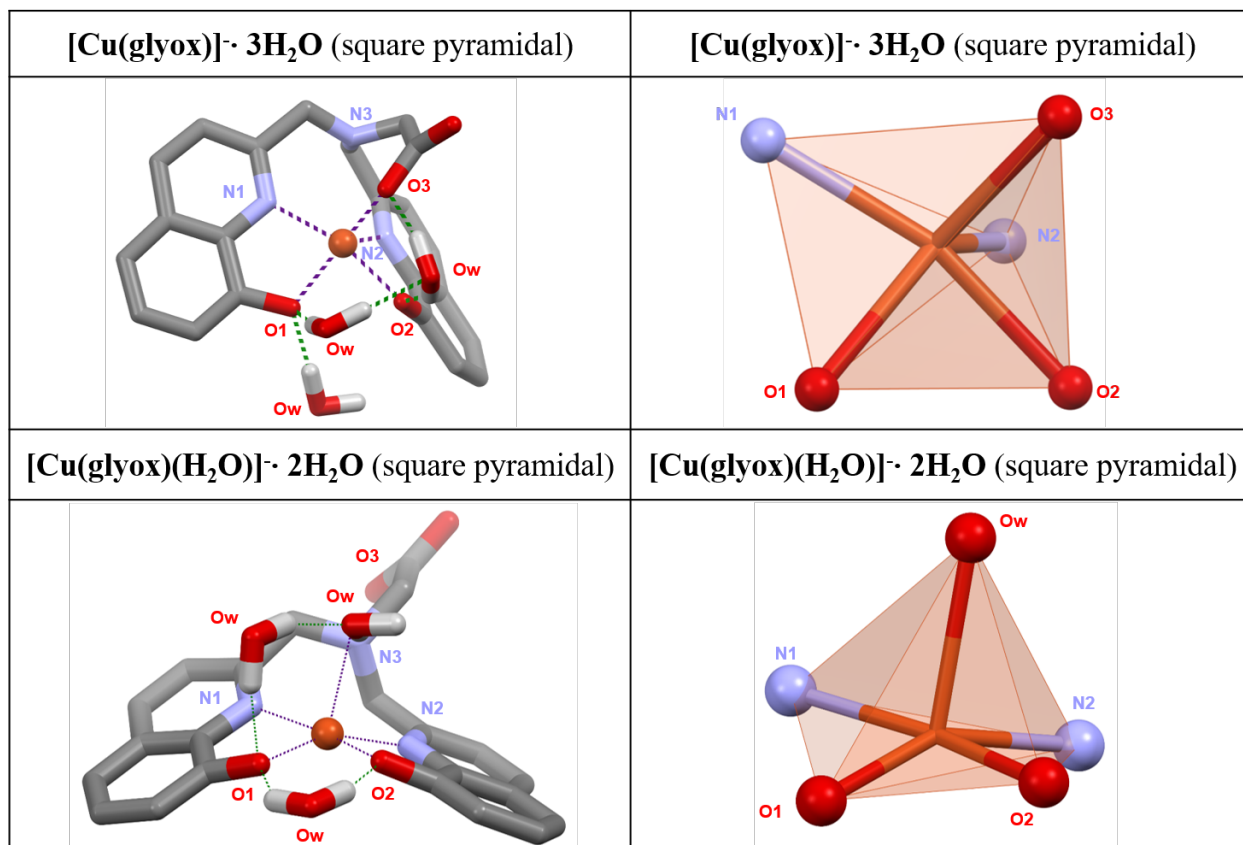

**Figure S18.** DFT calculated [Cu(glyox)]· 3H<sub>2</sub>O and [Cu(glyox)(H<sub>2</sub>O)]· 2H<sub>2</sub>O structures.

**Table S4.** Bond lengths from calculated [Cu(glyox)]· 3H<sub>2</sub>O, [Cu(glyox)(H<sub>2</sub>O)]· 2H<sub>2</sub>O structures.

|                                                     | M-O (ligand) distances (Å) |            |            |                        | M-N (Ligand) Distances (Å) |            |            | Free E (Ha) |
|-----------------------------------------------------|----------------------------|------------|------------|------------------------|----------------------------|------------|------------|-------------|
|                                                     | COOH<br>O3                 | Ox 1<br>O1 | Ox 2<br>O2 | H <sub>2</sub> O<br>Ow | Ox 1<br>N1                 | Ox 2<br>N2 | 3° N<br>N3 |             |
| <b>[Cu(glyox)]· 3H<sub>2</sub>O</b>                 | 2.115                      | 2.026      | 2.009      | -                      | 2.065                      | 2.182      | 2.746      | -1740.268   |
| <b>[Cu(glyox)(H<sub>2</sub>O)]· 2H<sub>2</sub>O</b> | -                          | 1.947      | 1.966      | 2.404                  | 2.149                      | 2.070      | 3.239      | -1740.252   |

**Table S5.** Bond lengths from calculated [Ga(glyox)(H<sub>2</sub>O)], [Mn(glyox)(H<sub>2</sub>O)]<sup>-</sup> and [Cu(glyox)]<sup>-</sup> DFT structures.

|                                            | M-O (ligand) distances (Å) |           |           |                  | M-N (Ligand) Distances (Å) |           |           |
|--------------------------------------------|----------------------------|-----------|-----------|------------------|----------------------------|-----------|-----------|
|                                            | COOH                       | Ox 1      | Ox 2      | H <sub>2</sub> O | Ox 1                       | Ox 2      | 3° N      |
|                                            | <b>O3</b>                  | <b>O1</b> | <b>O2</b> | <b>Ow</b>        | <b>N1</b>                  | <b>N2</b> | <b>N3</b> |
| [Ga(glyox)(H <sub>2</sub> O)]              | 1.933                      | 2.002     | 1.999     | 2.191            | 2.245                      | 2.233     | 2.644     |
| [Mn(glyox)(H <sub>2</sub> O)] <sup>-</sup> | 2.066                      | 2.065     | 2.069     | 2.325            | 2.149                      | 2.211     | 2.764     |
| [Cu(glyox)] <sup>-</sup>                   | 2.056                      | 2.000     | 2.013     | -                | 2.074                      | 2.209     | 2.781     |

**Table S6.** Bond lengths from calculated [Lu(glyox)(H<sub>2</sub>O)<sub>2</sub>]A, [Lu(glyox)(H<sub>2</sub>O)<sub>2</sub>]B structures.

|                                              | M-O (ligand) distances (Å) |           |           |                  | M-N (Ligand) Distances (Å) |           |           | Free E (Ha) |
|----------------------------------------------|----------------------------|-----------|-----------|------------------|----------------------------|-----------|-----------|-------------|
|                                              | COOH                       | Ox 1      | Ox 2      | H <sub>2</sub> O | Ox 1                       | Ox 2      | 3° N      |             |
|                                              | <b>O3</b>                  | <b>O1</b> | <b>O2</b> | <b>Ow</b>        | <b>N1</b>                  | <b>N2</b> | <b>N3</b> |             |
| [Lu(glyox)(H <sub>2</sub> O) <sub>2</sub> ]A | 2.252                      | 2.238     | 2.275     | 2.400<br>2.481   | 2.439                      | 2.423     | 2.600     | -2702.724   |
| [Lu(glyox)(H <sub>2</sub> O) <sub>2</sub> ]B | 2.230                      | 2.282     | 2.207     | 2.467<br>2.407   | 2.448                      | 2.439     | 2.649     | -2702.726   |

**Table S7.** Protonation constants (log  $K_{HqL}$ ), stability constants (log  $K_{ML}$ ), corresponding stepwise protonation constants (log  $K_{1q1}(MH_qL)^a$  and pM values of relevant Mn<sup>2+</sup> chelators.

|                                   | <b>H<sub>3</sub>glyox<sup>b</sup></b> | <b>H<sub>3</sub>dpaac<sup>c</sup></b> | <b>PyC3Ad<sup>d</sup></b> | <b>PCTAe<sup>e</sup></b> | <b>PC2A-EAe<sup>e</sup></b> |
|-----------------------------------|---------------------------------------|---------------------------------------|---------------------------|--------------------------|-----------------------------|
| log $K_{HL}$                      | 10.66(1)                              | 7.26(2)                               | 10.16(2)                  | 9.97                     | 11.34(1)                    |
| log $K_{H2L}$                     | 9.7(1)                                | 3.90(3)                               | 6.39(4)                   | 6.73                     | 8.93(2)                     |
| log $K_{H3L}$                     | 7.51(2)                               | 3.29(2)                               | 3.13(3)                   | 3.22                     | 6.91(3)                     |
| log $K_{H4L}$                     | 5.41(1)                               | 1.77(2)                               | -                         | 1.40                     | 1.97(3)                     |
| log $K_{H5L}$                     | 3.33(1)                               | -                                     | -                         | -                        | -                           |
| log $K_{H6L}$                     | 2.66(1)                               | -                                     | -                         | -                        | -                           |
| <b>Σ log <math>K_{HqL}</math></b> | <b>39.27</b>                          | <b>16.22</b>                          | <b>19.68</b>              | <b>21.32</b>             | <b>29.15</b>                |
| log $K_{MnL}$                     | 16.75(1)                              | 13.19(5)                              | 14.14(1)                  | 16.83                    | 19.01(4)                    |
| log $K_{MnHL}$                    | 7.17(1)                               | 2.90(6)                               | 2.43(3)                   | 1.96                     | 6.88(2)                     |
| log $K_{MnH2L}$                   | -                                     | -                                     | -                         | -                        | 2.50(3)                     |
| log $K_{Mn(OH)L}$                 | 10.45(2)                              | 11.97(6)                              | -                         | -                        | -                           |

<sup>a</sup>  $K_{1q1} = [MH_qL]/[MH_{q-1}L][H]^q$ ; <sup>b</sup>from ref.<sup>1</sup> <sup>c</sup>from ref.<sup>4</sup>; <sup>d</sup>from ref.<sup>2</sup>; <sup>e</sup>from ref.<sup>3</sup>;

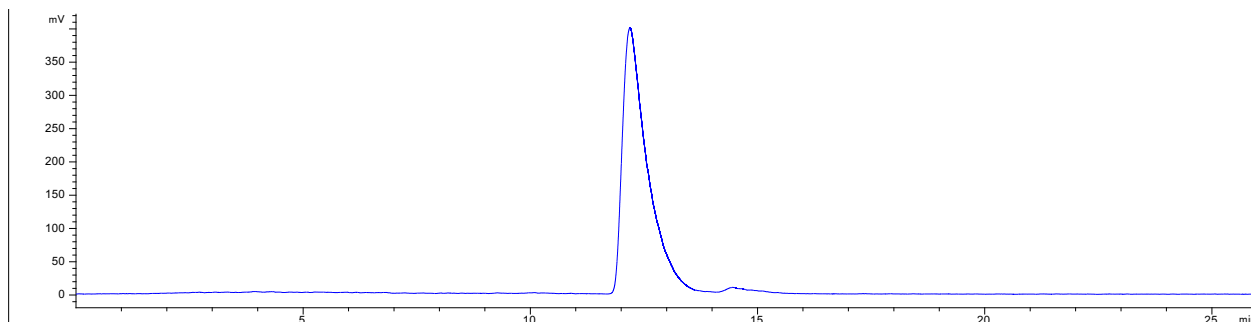

**Figure S19.** HPLC trace of H<sub>3</sub>glyox ( $t_R = 12.1$  min); eluents: (A) 0.1% TFA in H<sub>2</sub>O and (B) 0.1% TFA in ACN with a linear gradient 5% to 100% B for 25 min and flow rate set to 1 mL/min..

## References

- 1 N. Choudhary, M. de G. Jaraquemada-Peláez, K. Zarschler, X. Wang, V. Radchenko, M. Kubeil, H. Stephan, C. Orvig, *Inorg. Chem.*, 2020, **59**, 5728–5741.
- 2 E. M. Gale, I. P. Atanasova, F. Blasi, I. Ay and P. Caravan, *J. Am. Chem. Soc.*, 2015, **137**, 15548–15557.
- 3 R. Botár, E. Molnár, G. Trencsényi, J. Kiss, F. K. Kálmán and G. Tircsó, *J. Am. Chem. Soc.*, 2020, **142**, 1662–1666.
- 4 A. Forgács, R. Pujales-Paradela, M. Regueiro-Figueroa, L. Valencia, D. Esteban-Gómez, M. Botta and C. Platas-Iglesias, *Dalton Trans.*, 2017, **46**, 1546–1558.
